# Supplementary material for: Tracking down global NH 3 point sources with wind-adjusted superresolution
Source: Copernicus journal article supplement (doi:10.5194/amt-2019-99), 2019-05-20
Supplement: Supplementary file [file amt-2019-99-AC2-supplement.pdf]

## Anonymous Referee #2

This is a very-well written, and innovative study on how to use statistical techniques on long-time series to identify point sources of NH<sub>3</sub> emissions across the globe. The paper is an extension of an earlier study published in Nature (Van Damme et al., 2018), and shows that adding information on winds derived from ECMWF's ERA re-analysis, allows to further increase the statistical power to discriminate point sources from the background signal. The publication is build up in a logical well-chosen manner, examples (even if not pertaining per se to NH<sub>3</sub>) are well chosen. Somewhat surprising is that in this paper the authors do not estimate source strengths and uncertainties related to the point sources, for reasons not entirely clear to me. In contrast, the earlier Van Damme (2018) did provide such estimates (+uncertainties) so I do not see a strong reason why this paper wouldn't- of course provided that everything works well.

Thank you very much for your positive assessment of the paper and the detailed review. We have addressed all comments below, and where possible updated the text (this includes addressing the comment on mass conservation). The main exception is the comment on providing emission estimates. As we argue below, we think that such an analysis is largely beyond the scope of this paper, whose focus is on the new detection methodology.

In this context my main concerns are following:

- Mass conservation. Figure 3 nicely shows how oversampling and supersampling show enhanced plumes strength (as expressed by the maximum values). Given the short lifetime of NH<sub>3</sub> (likely short due to the abundant presence of sulfate aerosol), one can assume that the average column values in the 60x120 km domain are mostly (entirely?) determined by the local source. Can the authors demonstrate that the domain average (or integrated) NH<sub>3</sub> columns are conservative across cases a) through e). Have such screening been performed for all identified large sources, and what was the result? With other words can we be sure that the algorithm does not artificially add mass, and be used to receive source strengths?

Thank you very much for bringing up this question, which indeed should be addressed in this paper. The answer is not so simple however, as it depends whether it is discussed with respect to the spatial grid (ground truth) or with respect to the measurements. In fact, none of the procedures is mass conserving with respect to the ground truth, due to the finite number of measurements and their coarse resolution. In practice however, mass can be assumed to be conserved. In addition, in measurement space, supersampling is strictly mass conserving in the limit of a large number of iterations (we verified this on the examples of Fig 1, 2, and 3, as a way of verifying that the computer code did not contained any bugs). We have now added the values of the average columns in each subpanel in Figure 3, by means of illustration, and discussed the conservation issue in some length at the end of section 3:

*One useful property of the different procedures is that they all approximately conserve the quantity that is being averaged, i.e. the averaged quantity in each grid is approximately the same as the average quantity in the grid representing the ground truth, given sufficient number of measurements across the entire grid. When the number of measurements is low, this can break down dramatically, as can be seen with the extreme example of single high-value measurement over an isolated point source. When a gridded average is made from this single measurement onto a coarse grid (e.g. 5° × 5°), the entire grid cell containing the measurement will be associated with this high value, thus yielding an overestimation of the reality. A strict conservation is therefore not possible in general, as not enough information is contained in the original measurements to reconstruct the ground truth perfectly, even on average. That being said, supersampling conserves quantity with respect to the original*

*measurements, when the number of iterations is large enough. This is a consequence of the fact that the backprojected measurements converge to the actual measurements, and therefore also their averages. Finally note that wind-rotation does not alter quantity in anyway, as rotation simply redistributes the measurements to different locations on the grid. The average total NH<sub>3</sub> columns are indicated on each subpanel of Fig 3. The average of the ungridded measurements within the considered box equals  $5.23 \times 10^{15} \text{ molec}\cdot\text{cm}^{-2}$ . As can be seen the largest change in average column is caused by the rotation procedure, but this is simply an artifact caused by limiting the average to a square box around a point source (instead of a circle). This example illustrates that in practice, with differences smaller than one percent, the different gridding procedures can be assumed to conserve quantity.*

- This publication is an extension of the previous paper by Van Damme, which makes an important statement on the possible underestimation in inventories like EDGAR of nearly all agricultural and industrial point sources. As this paper is adding even more source, it would imply that the problem could be even aggravated. However, in none of these 2 papers an analysis is made of the potential impacts on regional and global emission budgets. I can easily imagine that the spatial allocation data used in inventories are not realistically representing a 0.1x0.1 degree resolution, but that 'point source' emissions are smeared out over larger areas. While the lack of spatial information in itself a serious problem, it may be less an issue for larger scale model analysis. It would be extremely helpful if the current paper could 1) provide quantitative information on derived emission strengths, similar to the previous paper 2) provide regional/global statistics of the aggregated amounts of annual point source emissions versus those in EDGAR and compared to all emissions, to get a better impression on how these new data would change our view on the global NH<sub>3</sub> budget. I recommend publication of this paper, after taken into account my concerns.

The focus of this paper is on introducing new methodologies for averaging satellite data and for the identification of point sources. In the second part of the paper the strengths of the new approach are demonstrated on NH<sub>3</sub>, and we show that with the new method, we can identify twice the amount of NH<sub>3</sub> point sources compared to regular oversampling. The paper was written specifically with AMT in mind, as its focus is on introducing this new methodology. As such, it already represents a significant body of research, code writing, data analysis and computational effort. In our opinion, the topic and results constitute a well-separated entity that deserves to be published separate from a quantitative derivation, analysis and discussion of emissions. While we agree that what the reviewer asks is important, and can in principle be done, it is not something that we wanted to do in this paper. In addition, doing so would entirely draw away the attention from the focus of the paper, which is on introducing a new detection method for point sources.

Minor comments:

P2 I. 14 what were these adverse effects?

The adverse effects of decreasing NO<sub>x</sub> and SO<sub>2</sub> emissions, is that these have been shown to increase NH<sub>3</sub> emissions and/or concentrations. We have clarified the sentence.

P2 I. 15 It is also related to other pollutant becoming relatively less important.

We do not understand how this comment relates to I15 as here we state that the regulative framework of NH<sub>3</sub> is limited due to the historical relative difficulty in measuring NH<sub>3</sub>.

P2 I. 24 Clarify what is meant with conservative residence time. Van Damme varied between 1, 12 and 48 hours. I presume you meant 48 hours- as this would imply the lowest emission rate? Not for this

paper, but you could get a better handle on the lifetime issue by collaborating with one or more modellers and relate lifetime to column and emission rates.

We meant 12 hours, which is already above the mean value reported (and thus indeed implies that our corresponding emission estimate is a lower bound). We have clarified the sentence by adding this 12 hour value.

P3 l. 16 'reduces spread and contribution of nearby source': I didn't get it. Explain better.

The entire sentence reads: *"As we will also demonstrate, this reduces the overall spread of the transported pollutants and reduces contributions of nearby sources."* At this point of the introduction, this is just anticipating what is about to come. The point is developed in detail in section 3, and so now we explicitly refer to it.

P 3 l. 30 What is meant with a constant underlying distribution? Of what? I didn't get it.

This sentence means that superresolution is only viable when each low resolution image is derived from the same reality, i.e. that the underlying distribution does not change in time. We have replaced "constant" with "an underlying distribution that does not change in time".

p. 5 l. 30 I haven't seen what is the case for NH<sub>3</sub>, only few iteration or many? And why?

Too many iterations result in overfitting on the data, especially for NH<sub>3</sub>, which has a large measurement uncertainty. In practice, we found that three iterations is a good compromise between smoothness and increasing the resolution. This was already partially covered in section 3, point d, but we have now added this sentence: *"Note that in general for NH<sub>3</sub>, 3 iterations of the IBP algorithm seems to offer a good compromise between increasing the resolution of the average, without introducing artefacts related to overfitting."*

p.6 l. 9 As described above the example seems to add 'mass' to with the oversampling/super sampling. The authors should show whether this is the case or not.

At first sight, it might seem that oversampling or supersampling adds mass in this example. This is a visual effect: while the mass clearly increases inside the NH<sub>3</sub> plume, it also seen to decrease outside the plume, in a much larger area. In response to the very first comment of the review, we have added the average column on each subpanel, and added a discussion on mass conservation (see above).

p. 6 l. 31 If understand it well this is discussing the McLinden approach (but not yours). 100 km<sup>2</sup> is quite a large area to calculate background and signal of point sources.

This is correct. 10 x 10 km<sup>2</sup> is large, but definitely not too large, given the lifetime of SO<sub>2</sub>/NH<sub>3</sub>.

p. 8 l. 25 what is meant with an NH<sub>3</sub> map. Concentration/column or emission?

The map, being built from averages of downwind maps of columns, is also a column map; as further explained in that section (see also the example provided in Fig 4).

P 10 l. 3. Noisy map and fictitious sources. How do you know that? Are you still speaking about 10x10 km areas for which oversampling/supersampling would create a noisy map?

It is not the oversampling/supersampling as such that creates a noisy map, but the application of the McLinden et al. approach of calculating differences up and downwind. As explained in the text, the problem comes from larger area sources, which produce a slowly varying NH<sub>3</sub> distribution. Small local differences are amplified in the McLinden et al. approach, which relies on differences between neighbouring column averages.

p. 10 l. 4 It sounds counterintuitive that only looking at downwind concentrations an improved point source map can be improved. What would this mean for the retrieved emission values? Some more theoretical foundation for this approach would be valuable.

From the discussion around figure 3, it can already be intuitively understood that looking at the downwind plume only, the map as described will show large local enhancements around point sources. The map has nothing to do with emission values. The only values that represent a reality are the values just above the point sources, representing the mean value of the downwind plume. As also written in the conclusion: *“However, other than for the identification of point sources, such a map is not easily exploitable, as it is a distorted representation of the reality that favours point sources.”*

p. 10 l. 23 ‘The new NH<sub>3</sub> map’. It would help the reader if you could give a better name to this map, describing what it really is. Something like ‘satellite derived source attribution map’ - it should be made clear that this is a calculated map- not something that is directly observable by the satellite instrument.

In fact, throughout the text we have consistently referred to the map as an “NH<sub>3</sub> point source map”, which we believe is a term that covers quite well the meaning of the map. We have now also used this terminology in this sentence.

p. 11 l. 3 improved performance in geo-allocation of the sources.

We have added “in geo-allocation of the sources” in this sentence.

p. 11 l. 4 point source map? See earlier comment. Use unique name for this product. I think it is more than a point source map (in the sense that there is quantitative information on source strength).

As explained above, we believe that this term is appropriate. It does give some quantitative information just above the point sources, but that quantitative aspect is also not reflected in the term ‘satellite derived source attribution map’ (and in fact the latter term does not express the fact that the map specifically is designed to highlight the point sources).

p. 11 l. 14 0.01x0.01 degree corresponds roughly to 1-1 to 2-2 km? Maybe helpful to give the reader a feeling for this.

Yes that is correct – we have added this info now: “corresponding to a horizontal resolution of the order of 1-2 km”.

p. 11 l. 16 I am wondering if there is not something smarter possible, based on a prescreening of all available IASI observations. If no elevated concentrations are found in any data point it is not likely to be a relevant points source. Possibly for discussion or future work. Or maybe I understood it wrong, and you are describing what you don’t want to do?

You did understand this correctly. Yes, it is definitely possible to be more selective by prescreening, and removing entire regions, but the danger always exist to miss weak point sources (recall that we can detect even very weak point sources, as long as they increase NH<sub>3</sub> locally).

p. 11 | 23 what is meant with a single point source map? A single year? A single source? Clarify.

A single point source map is a map like in Figure 4. For this study, as explained in the beginning of that section, we constructed several ones: *“A few such maps were constructed varying the size of the averaging box, and the applied wind speeds (either in the middle of the boundary layer or at 100 meter).”*

p. 11 | 29/30 This is confusing as statements are made on disagreement with emission inventories.

In this paper we strictly deal with a qualitative detection of point sources, and make no statements on disagreement with emission inventories (unlike in Van Damme et al. , 2018). This sentence reinforces this, stating that the presence of a point source in the catalog should not be seen as a quantitative indicator of its emission strength.

P 13 | 26. What would be the equivalent retrieved concentration (with some reasonable assumption on BL height).

We assume the reviewer means equivalent column. Assuming an approximate conversion (from a standard model of)  $3 \times 10^{15}$  molec/cm<sup>2</sup> per ppb this would be of the order of 1 to  $2 \times 10^{17}$  molec/cm<sup>2</sup>.
